# Supplementary material for: Complementary and alternative medicine mention and recommendations in inflammatory bowel disease guidelines: systematic review and assessment using AGREE II
Source: BMC Complement Med Ther. 2023 Jul 11;23:230. doi: 10.1186/s12906-023-04062-0 (PMC10334672; doi:10.1186/s12906-023-04062-0)
Supplement: Supplementary file 2 — Supplementary Material 2 [file 12906_2023_4062_MOESM2_ESM.xlsx]

## Sheet: Sheet1
Supplementary File 2: Modified AGREE II Questions Used to Guide Scoring of CAM Sections of Each Guideline
		Scope and Purpose			Stakeholder Involvement			Rigour of Development								Clarity and Presentation			Applicability				Editorial Independence		Overall Assessment
AGREE II Instrument Item	AGREE II Question (Ranked between 1 [Strongly Disagree and 7 [Strongly Agree])	1. The overall objective(s) of the guideline is (are) specifically described.	2. The health question(s) covered by the guideline is (are) specifically described.	3. The population (patients, public, etc.) to whom the guideline is meant to apply is specifically described.	4. The guideline development group includes individuals from all relevant professional groups.	5. The views and preferences of the target population (patients, public, etc.) have been sought.	6. The target users of the guideline are clearly defined.	7. Systematic methods were used to search for evidence.	8. The criteria for selecting the evidence are clearly described.	9. The strengths and limitations of the body of evidence are clearly described.	10. The methods for formulating the recommendations are clearly described.	11. The health benefits, side effects, and risks have been considered in formulating the recommendations.	12. There is an explicit link between the recommendations and the supporting evidence.	13. The guideline has been externally reviewed by experts prior to its publication.	14. A procedure for updating the guideline is provided.	15. The recommendations are specific and unambiguous.	16. The different options for management of the condition or health issue are clearly presented.	17. Key recommendations are easily identifiable.	18. The guideline describes facilitators and barriers to its application.	19. The guideline provides advice and/or tools on how the recommendations can be put into practice.	20. The potential resource implications of applying the recommendations have been considered.	21. The guideline presents monitoring and/or auditing criteria.	22. The views of the funding body have not influenced the content of the guideline.	23. Competing interests of guideline development group members have been recorded and addressed.	Rate the overall quality of this guideline. (Ranked from 1 [Lowest Possible Quality] to 7 [Highest Possible Quality])	I would recommend this guideline for use: (Select from between "Yes", "Yes with Modifications" and "No")
AGREE II Evaluation 1: Overall guideline (i.e. which includes both CAM and Non-CAM sections).		Item Unchanged	Item Unchanged	Item Unchanged	Item Unchanged	Item Unchanged	Item Unchanged	Item Unchanged	Item Unchanged	Item Unchanged	Item Unchanged	Item Unchanged	Item Unchanged	Item Unchanged	Item Unchanged	Item Unchanged	Item Unchanged	Item Unchanged	Item Unchanged	Item Unchanged	Item Unchanged	Item Unchanged	Item Unchanged	Item Unchanged	Based on final score	Based on final score
AGREE II Evaluation 2: CAM Section(s) and Recommendation(s)		Were the overall objective(s) of the guideline specifically described?	Is the health question(s) covered by the guideline specifically described?	Is the CAM population (patients, public, etc.) to whom the CAM-sections of the guideline is meant to apply is specifically described? (likely an identical score to the overall guideline score)	Does it involve CAM experts?	Were the views and preferences of CAM-related therapies in the target population sought?	Were CAM patients of the CAM guidelines clearly defined?	Were systematic methods used to search for CAM evidence?	Were the criteria for selecting CAM evidence clearly described?	Were strengths and limintrations of the body of CAM evidence clearly described?	Were methods for formulating the CAM recommendations are clearly described?	Were the health benefits, side effects, and risks have been considered in formulating CAM recommendations?	Was an explicit link between the CAM recommendations and the supporting evidence?	Was the guideline externally reviewed by CAM experts prior to its publication?	Is there a procedure to include the CAM section(s) of the guideline (i.e. this can be scored equally if there's a procedure to update the entire guideline).	Were the CAM recommendations specific and unambiguous?	Were the different CAM options for management of the condition or health issue are clearly presented?	Were key CAM recommendations are easily identifiable?	Did the guideline describe facilitators and barriers to the application of CAM-specific recommendations?	Did the guideline provide advice and/or tools on how the CAM recommendations can be put into practice?	Were potential resource implications of applying the CAM recommendations been considered?	Did the guideline present monitoring and/or auditing criteria for the CAM-specific recommendations?	Did views of the funding body influence the CAM content of the guideline?	Were competing interests of CAM members of the guideline development group members recorded and addressed?	Based on final score	Based on final score
